# Supplementary material for: Investigations of fine-scale phylogeography in Tigriopus californicus reveal historical patterns of population divergence
Source: PubMed Central journal article supplement (PMC2708153; doi:10.1186/1471-2148-9-139), 2009-06-23
Supplement: 1471-2148-9-139-S5.pdf [file 1471-2148-9-139-S5.pdf]

**Supplemental Table S3.** Pairwise percent sequence divergence between selected haplotypes for CYTB

|               | Tjap korea | Tjap japan | RsPt f4 | AB1m    | SDh    | LJP m4     | BSB f1  | LJ P f4 | BSB f3   | LJS f2  | FR1 m3  | BR m5   | PVL f16 | BHar f3 | SCN1m    | IP f1   |
|---------------|------------|------------|---------|---------|--------|------------|---------|---------|----------|---------|---------|---------|---------|---------|----------|---------|
|               | 1          | 2          | 3       | 4       | 5      | 6          | 7       | 8       | 9        | 10      | 11      | 12      | 13      | 14      | 15       | 16      |
| 1 Tjap korea  | -          |            |         |         |        |            |         |         |          |         |         |         |         |         |          |         |
| 2 Tjap japan  | 0.28736    | -          |         |         |        |            |         |         |          |         |         |         |         |         |          |         |
| 3 RsPt f4     | 0.29177    | 0.3113     | -       |         |        |            |         |         |          |         |         |         |         |         |          |         |
| 4 AB1m        | 0.29667    | 0.31255    | 0.016   | -       |        |            |         |         |          |         |         |         |         |         |          |         |
| 5 SDh         | 0.31138    | 0.30341    | 0.19786 | 0.20118 | -      |            |         |         |          |         |         |         |         |         |          |         |
| 6 LJP m4      | 0.30531    | 0.30617    | 0.20284 | 0.2061  | 0.1011 | -          |         |         |          |         |         |         |         |         |          |         |
| 7 BSB f1      | 0.28364    | 0.30703    | 0.20161 | 0.20411 | 0.2112 | 0.20906    | -       |         |          |         |         |         |         |         |          |         |
| 8 LJ P f4     | 0.30752    | 0.30755    | 0.20004 | 0.20331 | 0.1028 | 0.00533    | 0.207   | -       |          |         |         |         |         |         |          |         |
| 9 BSB f3      | 0.28364    | 0.30703    | 0.20161 | 0.20411 | 0.2112 | 0.20906    | 0       | 0.207   | -        |         |         |         |         |         |          |         |
| 10 LJS f2     | 0.3056     | 0.3073     | 0.20936 | 0.21262 | 0.1031 | 0.00624    | 0.2137  | 0.01069 | 0.2137   | -       |         |         |         |         |          |         |
| 11 FR1 m3     | 0.29181    | 0.31229    | 0.01246 | 0.01247 | 0.2024 | 0.20469    | 0.20563 | 0.2019  | 0.20563  | 0.21121 | -       |         |         |         |          |         |
| 12 BR m5      | 0.30592    | 0.30858    | 0.20578 | 0.20904 | 0.1035 | 0.00797    | 0.20924 | 0.00886 | 0.20924  | 0.00887 | 0.20763 | -       |         |         |          |         |
| 13 PVL f16    | 0.29162    | 0.31374    | 0.00447 | 0.01338 | 0.2015 | 0.20478    | 0.20326 | 0.20197 | 0.20326  | 0.21132 | 0.01158 | 0.20773 | -       |         |          |         |
| 14 BHar f3    | 0.28529    | 0.30858    | 0.20534 | 0.20783 | 0.2133 | 0.21017    | 0.00994 | 0.2081  | 0.00994  | 0.21484 | 0.20936 | 0.21036 | 0.20733 | -       |          |         |
| 15 SCN1m      | 0.30799    | 0.31763    | 0.20045 | 0.20482 | 0.2072 | 0.19795    | 0.15189 | 0.19955 | 0.15189  | 0.19905 | 0.20252 | 0.19735 | 0.20349 | 0.15365 | -        |         |
| 16 IP f1      | 0.29647    | 0.31419    | 0.01508 | 0.00267 | 0.2019 | 0.20505    | 0.20743 | 0.20227 | 0.20743  | 0.21158 | 0.01155 | 0.208   | 0.01246 | 0.21116 | 0.20731  | -       |
| 17 Pes m9     | 0.313      | 0.32095    | 0.19954 | 0.20374 | 0.207  | 0.20219    | 0.15714 | 0.20379 | 0.15714  | 0.20331 | 0.20322 | 0.20159 | 0.2024  | 0.15891 | 0.00885  | 0.20623 |
| 18 CCR2 f3    | 0.30858    | 0.31919    | 0.20309 | 0.20729 | 0.2061 | 0.20042    | 0.15175 | 0.20202 | 0.15175  | 0.20153 | 0.20499 | 0.19982 | 0.20597 | 0.1535  | 0.00354  | 0.20976 |
| 19 Pes m10    | 0.313      | 0.32095    | 0.19954 | 0.20374 | 0.207  | 0.20219    | 0.15714 | 0.20379 | 0.15714  | 0.20331 | 0.20322 | 0.20159 | 0.2024  | 0.15891 | 0.00885  | 0.20623 |
| 20 SCN7m      | 0.30769    | 0.31919    | 0.20397 | 0.20817 | 0.2078 | 0.20307    | 0.15534 | 0.20467 | 0.15534  | 0.20419 | 0.20588 | 0.20248 | 0.20684 | 0.1571  | 0.00619  | 0.21066 |
| 21 Sd1f       | 0.31104    | 0.30656    | 0.19651 | 0.19979 | 0.0045 | 0.09952    | 0.21501 | 0.10124 | 0.21501  | 0.0997  | 0.20103 | 0.10189 | 0.20012 | 0.21705 | 0.20484  | 0.2005  |
| 22 LS m1 cytb | 0.31211    | 0.30504    | 0.19692 | 0.2002  | 0.0027 | 0.10107    | 0.21366 | 0.1028  | 0.21366  | 0.10127 | 0.20142 | 0.10345 | 0.2005  | 0.21569 | 0.20621  | 0.2009  |
| 23 SCL f4     | 0.31465    | 0.30927    | 0.19753 | 0.20082 | 0.0045 | 0.10284    | 0.21441 | 0.10366 | 0.21441  | 0.10304 | 0.20207 | 0.10524 | 0.20103 | 0.21645 | 0.2088   | 0.20152 |
| 24 LgBch m2   | 0.31183    | 0.30273    | 0.1978  | 0.2002  | 0.025  | 0.09529    | 0.2136  | 0.09701 | 0.2136   | 0.09546 | 0.20144 | 0.09766 | 0.20055 | 0.21385 | 0.1982   | 0.2009  |
| 25 LagBch m1  | 0.31155    | 0.30269    | 0.19884 | 0.20122 | 0.025  | 0.09494    | 0.21385 | 0.09666 | 0.21385  | 0.0951  | 0.20246 | 0.09731 | 0.20158 | 0.21411 | 0.20014  | 0.20191 |
| 26 LJP2 f3    | 0.30474    | 0.30651    | 0.20312 | 0.20638 | 0.1022 | 0.00534    | 0.20918 | 0.00801 | 0.20918  | 0.00624 | 0.20496 | 0.0062  | 0.20505 | 0.21031 | 0.19722  | 0.20535 |
| 27 RP1 f5     | 0.29667    | 0.31618    | 0.0151  | 0.00799 | 0.2011 | 0.20609    | 0.20647 | 0.2033  | 0.20647  | 0.21262 | 0.01242 | 0.20903 | 0.01247 | 0.21022 | 0.20392  | 0.00708 |
| 28 AB3 f11    | 0.29872    | 0.31295    | 0.01867 | 0.00267 | 0.2022 | 0.2072     | 0.20744 | 0.2044  | 0.20744  | 0.21374 | 0.01511 | 0.21015 | 0.01605 | 0.21117 | 0.20768  | 0.00532 |
| 29 BHar f2    | 0.29037    | 0.31082    | 0.2085  | 0.21169 | 0.2161 | 0.21297    | 0.01169 | 0.21094 | 0.01169  | 0.21756 | 0.21178 | 0.21315 | 0.21024 | 0.00091 | 0.15733  | 0.21518 |
| 30 Dume m9    | 0.30918    | 0.32083    | 0.20869 | 0.20614 | 0.2022 | 0.21275    | 0.22659 | 0.21161 | 0.22659  | 0.21387 | 0.20795 | 0.21113 | 0.20546 | 0.22429 | 0.21014  | 0.20969 |
| 31 Dume m10   | 0.30918    | 0.32173    | 0.20779 | 0.20524 | 0.2013 | 0.21184    | 0.22568 | 0.21071 | 0.22568  | 0.21296 | 0.20705 | 0.21022 | 0.20456 | 0.22339 | 0.20924  | 0.20879 |
| 32 Cat 7      | 0.29296    | 0.31145    | 0.19512 | 0.19439 | 0.1974 | 0.2024     | 0.2234  | 0.2031  | 0.2234   | 0.20441 | 0.19781 | 0.20261 | 0.19708 | 0.22167 | 0.19861  | 0.19593 |
| 33 Cat 5 Cytb | 0.29204    | 0.31241    | 0.19267 | 0.19194 | 0.1962 | 0.20086    | 0.22105 | 0.20156 | 0.22105  | 0.20383 | 0.19536 | 0.20021 | 0.19462 | 0.21934 | 0.19637  | 0.19348 |
|               | Pes m9     | CCR2 f3    | Pes m10 | SCN7m   | Sd1f   | LS m1 cytb | SCL f4  | LgBch m | LagBch n | LJP2 f3 | RP1 f5  | AB3 f11 | BHar f2 | Dume m9 | Dume m10 | Cat 7   |
|               | 17         | 18         | 19      | 20      | 21     | 22         | 23      | 24      | 25       | 26      | 27      | 28      | 29      | 30      | 31       | 32      |
| 17 Pes m9     | -          |            |         |         |        |            |         |         |          |         |         |         |         |         |          |         |
| 18 CCR2 f3    | 0.00884    | -          |         |         |        |            |         |         |          |         |         |         |         |         |          |         |
| 19 Pes m10    | 0          | 0.00884    | -       |         |        |            |         |         |          |         |         |         |         |         |          |         |
| 20 SCN7m      | 0.01149    | 0.00442    | 0.01149 | -       |        |            |         |         |          |         |         |         |         |         |          |         |
| 21 Sd1f       | 0.20463    | 0.20552    | 0.20463 | 0.20639 | -      |            |         |         |          |         |         |         |         |         |          |         |
| 22 LS m1 cytb | 0.20601    | 0.2069     | 0.20601 | 0.2069  | 0.0018 | -          |         |         |          |         |         |         |         |         |          |         |
| 23 SCL f4     | 0.20849    | 0.20949    | 0.20849 | 0.20949 | 0.0036 | 0.00178    | -       |         |          |         |         |         |         |         |          |         |
| 24 LgBch m2   | 0.20156    | 0.19889    | 0.20156 | 0.19978 | 0.0223 | 0.02218    | 0.02414 | -       |          |         |         |         |         |         |          |         |
| 25 LagBch m1  | 0.20348    | 0.20083    | 0.20348 | 0.20171 | 0.0222 | 0.02211    | 0.02407 | 0       | -        |         |         |         |         |         |          |         |
| 26 LJP2 f3    | 0.20237    | 0.19969    | 0.20237 | 0.20235 | 0.1006 | 0.10213    | 0.10391 | 0.09633 | 0.09597  | -       |         |         |         |         |          |         |
| 27 RP1 f5     | 0.20283    | 0.20637    | 0.20283 | 0.20726 | 0.1998 | 0.20016    | 0.20078 | 0.20016 | 0.20119  | 0.20639 | -       |         |         |         |          |         |
| 28 AB3 f11    | 0.20659    | 0.21013    | 0.20659 | 0.21103 | 0.2009 | 0.20125    | 0.20008 | 0.20125 | 0.20227  | 0.2075  | 0.01063 | -       |         |         |          |         |
| 29 BHar f2    | 0.16251    | 0.15718    | 0.16251 | 0.16072 | 0.2199 | 0.21842    | 0.21919 | 0.21662 | 0.21686  | 0.21311 | 0.21404 | 0.21518 | -       |         |          |         |
| 30 Dume m9    | 0.21281    | 0.211      | 0.21281 | 0.21368 | 0.1989 | 0.20125    | 0.20211 | 0.20762 | 0.2068   | 0.21163 | 0.2067  | 0.20792 | 0.22492 | -       |          |         |
| 31 Dume m10   | 0.2119     | 0.2101     | 0.2119  | 0.21278 | 0.198  | 0.20034    | 0.2012  | 0.20671 | 0.2059   | 0.21072 | 0.20579 | 0.20702 | 0.22401 | 0.0009  | -        |         |
| 32 Cat 7      | 0.19949    | 0.19763    | 0.19949 | 0.19854 | 0.1944 | 0.19589    | 0.19741 | 0.1994  | 0.19887  | 0.20193 | 0.19399 | 0.19594 | 0.22174 | 0.02971 | 0.03063  | -       |
| 33 Cat 5 Cytb | 0.19726    | 0.19541    | 0.19726 | 0.19633 | 0.1938 | 0.19538    | 0.1969  | 0.19912 | 0.19835  | 0.20058 | 0.19154 | 0.19349 | 0.2194  | 0.03048 | 0.03139  | 0.00093 |
