# Supplementary material for: Investigations of fine-scale phylogeography in Tigriopus californicus reveal historical patterns of population divergence
Source: BMC Evol Biol. 2009 Jun 23;9:139. doi: 10.1186/1471-2148-9-139 (PMC2708153; doi:10.1186/1471-2148-9-139)
Supplement: Additional file 1 — Table S1. Sampling locations for Tigriopus californicus in southern and central California. [file 1471-2148-9-139-S1.pdf]

**Supplemental Table S1. Sampling locations for *Tigriopus californicus* in southern and central California.**

| Region           | Site | Location                      | Collection date | Distance (km) <sup>1</sup> | Description/notes <sup>2</sup>                                                                      |
|------------------|------|-------------------------------|-----------------|----------------------------|-----------------------------------------------------------------------------------------------------|
| West Vancouver   | BC   | N49°20'17.2"<br>W123°15'0.7"  | 7/06            | 172.9                      | Edge of extensive rocky habitat, scattered pools                                                    |
| Vancouver Island | VI   | N48°56'0.7"<br>W125°32'28.6"  | 7/06            | 1199                       | Extensive rocky habitat nearby, several dense pools                                                 |
| Bodega Head      | BSB  | N38°18'18.4"<br>W123°03'55.5" | 9/04            | 2.46                       | Extensive, nearly continuous rocky habitat, many pools                                              |
|                  | BHAR | N38°18'16.4"<br>W123°03'22.2" | 9/04            | 129.1                      | Limited rock shelf in harbor, with few pools                                                        |
| Pescadero        | PES  | N37°15'34.9"<br>W122°24'50.8" | 9/04            | 46.97                      | Site sampled on numerous previous occasions                                                         |
| Santa Cruz       | NB1  | N36°56'57.5"<br>W122°03'40.7" | 9/04            | 0.184                      | Numerous pools in large outcrop                                                                     |
|                  | NB2  | N36°57'00.2"<br>W122°03'34.5" | 9/04            | 0.641                      | Numerous pools in large outcrop, 20m beach between NB1 and NB2, copepods sampled on other occasions |
|                  | BH   | N36°56'57.1"<br>W122°03'14.5" | 9/04            | 0.877                      | One isolated pool with copepods on high shelf                                                       |
|                  | SCN  | N36°56'58.3"<br>W122°02'49.1" | 2002, 9/04      | 0.205                      | Numerous pools in large outcrop, copepod pools present at all of many previous visits               |
|                  | SC2  | N36°56'59.5"<br>W122°02'43.4" | 9/04            | 0.129                      | Moderate numbers pools in medium-sized outcrop, small sandy stretch separates from SCN              |
|                  | SC3  | N36°57'01.5"<br>W122°02'39.8" | 9/04            | 0.185                      | Moderate numbers pools in medium-sized outcrop                                                      |
|                  | SC4  | N36°57'04.5"<br>W122°02'34.3" | 9/04            | 0.576                      | Scattered pools in medium-sized rocky ledge                                                         |
|                  | SC5  | N36°57'10.3"<br>W122°02'16.3" | 9/04            | 1.18                       | Few pools in small-sized outcrop                                                                    |
|                  | LH   | N36°57'03.8"                  | 9/04            | 5.30                       | Moderate number of pools, high shelf above ocean,                                                   |

<sup>1</sup> This is the distance between the site and the one below it and is the straight-line distance between sites in different regions or the coastal distance between sites within a region.

<sup>2</sup> Description notes the abundance of pools containing copepods on the sampled date (and in some cases previous observations) and may not reflect long-term available copepod habitat.

|             |      |                                                |            |                              |                                                                                                                |
|-------------|------|------------------------------------------------|------------|------------------------------|----------------------------------------------------------------------------------------------------------------|
|             | CCR1 | W122°01'36.8"<br>N36°57'34.6"<br>W121°59'24.4" | 9/04       | 0.427                        | observed absence of copepods from 9/79-6/80 <sup>3</sup><br>Few pools in high rocky ledge                      |
|             | CCR2 | N36°57'36.7"<br>W121°59'19.1"                  | 9/04       | 171.3                        | Few pools in high rocky ledge, 50m of beach separates from CCR1                                                |
| San Simeon  | SS   | N35°34'53.9"<br>W121°07'16.2"                  | 9/04       | 275.3                        | Extensive but discontinuous rocky habitat                                                                      |
| Point Dume  | Dume | N34°00'01.0"<br>W118°48'24.3"                  | 9/04       | 43.30                        | Note: may not be same as PD site previously sampled from this region                                           |
| Palos Verde | FR1  | N33°47'49.6"<br>W118°24'29.8"                  | 9/04       | 0.333                        | Moderate numbers pools in medium-sized outcrop, copepods sampled on numerous occasions                         |
|             | FR2  | N33°47'41.8"<br>W118°24'27.8"                  | 9/04       | 4.74                         | Few pools in small-sized outcrop, boulders to FR1                                                              |
|             | RsPt | N33°45'58.8"<br>W118°25'28.3"                  | 9/04       | 4.08                         | Small number of inhabited pools in medium-sized outcrop                                                        |
|             | PVL  | N33°44'28.8"<br>W118°24'27.2"                  | 9/04       | 3.45                         | Small pools in large boulders, limited habitat in area                                                         |
|             | ABR  | N33°44'26.6"<br>W118°22'39.5"                  | 9/04       | 0.672                        | Small pools in one large boulder, no other habitat until AB currently available                                |
|             | AB   | N33°44'15.9"<br>W118°22'31.0"                  | 2002       | 0.032                        | Few pools in small outcrop, separated from AB2 by narrow surge channel, copepods sampled on numerous occasions |
|             | AB2  | N33°44'14.9"<br>W118°22'30.6"                  | 2002, 9/04 | 0.146                        | Numerous pools in large outcrop                                                                                |
|             | AB3  | N33°44'12.9"<br>W118°22'25.9"                  | 9/04       | 0.697                        | Numerous pools in large outcrop, separated from AB2 by narrow surge channel                                    |
|             | IP   | N33°44'10.6"<br>W118°22'10.5"                  | 9/04       | 6.11                         | Numerous pools in large outcrop, beach separates from AB3                                                      |
|             | RP2  | N33°42'56.5"<br>W118°19'12.0"                  | 9/04       | 0.338                        | Flat rocky outcrop with moderate pool numbers, copepods sampled on numerous occasions                          |
|             | RP1  | N33°42'50.1"<br>W118°19'03.2"                  | 9/04       | 33.58/<br>51.73 <sup>4</sup> | Medium-sized outcrop outcrop with moderate pool numbers                                                        |

<sup>3</sup> Burton and Feldman, 1981

<sup>4</sup> Distance from RP1 to CAT/LagBch

|                 |        |                               |                |                              |                                                                                                   |
|-----------------|--------|-------------------------------|----------------|------------------------------|---------------------------------------------------------------------------------------------------|
| Catalina Island | CAT    | N33°26.8'<br>W118°28.6'       | 6/06           | 64.58/<br>68.47 <sup>5</sup> |                                                                                                   |
| Laguna Beach    | LagBch | N33°32'41.4"<br>W117°47'58.4" | 9/04           | 90.48                        | Note: samples from S. Crescent Bay and not previously sampled LB site from this region            |
| La Jolla        | SIO    | N32°52'15.5"<br>W117°15'11.4" | 11/02          | 3.62                         | Scattered pools in boulders, limited numbers of pools, extensive beach to LJP1                    |
|                 | LJP1   | N32°51'04.5"<br>W117°16'24.3" | 11/02,<br>9/04 | 0.326                        | Large outcrop with a moderate number of pools, copepods sampled on several previous occasions     |
|                 | LJP2   | N32°50'58.2"<br>W117°16'33.0" | 9/04           | 0.588                        | Small outcrop with small number of pools, rocks and beach to LJP1                                 |
|                 | LJP3   | N32°50'46.3"<br>W117°16'44.2" | 9/04           | 0.435                        | Moderate-sized outcrop with limited numbers of inhabited pools, beach separates from LJP2 and LJS |
|                 | LJS    | N32°50'36.1"<br>W117°16'50.9" | 11/02          | 1.30                         | Numerous pools in large, flat, expansive outcrop                                                  |
|                 | NAUT   | N32°49'56.9"<br>W117°16'55.6" | 9/04           | 2.63                         | Moderate-sized outcrop with limited numbers of inhabited pools                                    |
|                 | BR     | N32°48'54.0"<br>W117°16'23.1" | 11/02          | 7.89                         | Isolated large rock platform outcrop                                                              |
| Point Loma      | SD     | N32°44'44.4"<br>W117°15'18.0" | 2002           | 1.41                         | Large outcrop with a large number of pools, copepod pools present at all of many previous visits  |
|                 | SCL    | N32°43'59.0"<br>W117°15'25.3" | 9/04           | 1.48                         | Moderated-sized ledge with a few large pools                                                      |
|                 | LS     | N32°43'11.2"<br>W117°15'25.1" | 11/02          |                              | Small outcrop with shallow pools in boulders                                                      |

---

<sup>5</sup> Distance from CAT to LagBch/Dume
