# Supplementary material for: Investigations of fine-scale phylogeography in Tigriopus californicus reveal historical patterns of population divergence
Source: BMC Evol Biol. 2009 Jun 23;9:139. doi: 10.1186/1471-2148-9-139 (PMC2708153; doi:10.1186/1471-2148-9-139)
Supplement: Additional file 2 — Table S2. Primers used for PCR amplifications for the CYTB and RISP genes from T. californicus. [file 1471-2148-9-139-S2.pdf]

**Supplemental Table S2** Primers used for PCR amplifications for the *CYTB* and *RISP* genes from *T. californicus*. Annealing temperatures typically used in the PCR reactions are given as well. The first set of primers were designed to match *CYTB* sequences from each of the four regions, but in some cases, primers specific to a single region were needed to get robust amplifications. Additional details of PCR and sequencing are available upon request from C.S.W..

| Gene/Populations                     | Forward primer | Sequence (5' to 3')        | Reverse primer | Sequence (5' to 3')      | Annealing temperature |
|--------------------------------------|----------------|----------------------------|----------------|--------------------------|-----------------------|
| <b><i>CYTB</i></b>                   |                |                            |                |                          |                       |
| Most populations                     | COIIddeg.f     | TGYGGGGCKAAYCATAGKTTTATACC | ND4deg.r       | ACGYTCKGGYTGRTAMCCYCAACC | 45°C                  |
| Palos Verdes region, CAT, BC, VI, SS | Cytbf2.AB      | TTAAAATTATTGCTCTGGGCAAT    | CytbR2in.AB    | TTAGGATACCACAAACCCTTGT   | 52°C                  |
| La Jolla region                      | Cytbstart.f.LJ | TAATTGCTTTGGGCAGTTTCTA     | Cytbstop.r.LJ  | ACCTAGGATACCACAAACCCTTA  | 45°C                  |
| Santa Cruz region                    | COIIddeg.f     | See above                  | CytbR5.SC      | TGCTATAACAAGGCCGAAACTTGC | 58°C                  |
| <b><i>RISP</i></b>                   |                |                            |                |                          |                       |
| All populations                      | RISPstart.f    | CTTGGACTGGTGAACAAGATG      | RISPstop.r     | TTATCCCACAATGACCATGCCTTC | 54°C                  |
