# Supplementary material for: Investigations of fine-scale phylogeography in Tigriopus californicus reveal historical patterns of population divergence
Source: BMC Evol Biol. 2009 Jun 23;9:139. doi: 10.1186/1471-2148-9-139 (PMC2708153; doi:10.1186/1471-2148-9-139)
Supplement: Additional file 6 — Table S4. FST values for CYTB from Arlequin based on pairwise comparisons of populations (pairwise sequence divergence). [file 1471-2148-9-139-S6.pdf]

**Supplemental Table S4.** Fst values for CYTB from arlequin based on pairwise comparisons of populations (pairwise sequence divergence). Values that were not significant based on permutation analyses are indicated by (NS). Significance is based on  $\alpha=0.05$  in a Sequential Bonferroni procedure.

|        | 1          | 2       | 3       | 4           | 5            | 6       | 7           | 8       | 9           | 10          | 11          | 12           | 13           | 14          | 15           |         |
|--------|------------|---------|---------|-------------|--------------|---------|-------------|---------|-------------|-------------|-------------|--------------|--------------|-------------|--------------|---------|
|        | SD         | SunCl   | LS      | LJS         | Naut         | BR      | SIO         | LJP     | LJP2        | LJP3        | RP1         | RP2          | IP           | AB3         | AB2          |         |
| SD     | 1 0        |         |         |             |              |         |             |         |             |             |             |              |              |             |              |         |
| SunCl  | 2 0.49216  | 0       |         |             |              |         |             |         |             |             |             |              |              |             |              |         |
| LS     | 3 0.39423  | 0.5698  | 0       |             |              |         |             |         |             |             |             |              |              |             |              |         |
| LJS    | 4 0.98504  | 0.9918  | 0.99364 | 0           |              |         |             |         |             |             |             |              |              |             |              |         |
| Naut   | 5 0.9829   | 0.98856 | 0.99064 | 0.00128(NS) | 0            |         |             |         |             |             |             |              |              |             |              |         |
| BR     | 6 0.9741   | 0.97371 | 0.97627 | 0.65331     | 0.57549      | 0       |             |         |             |             |             |              |              |             |              |         |
| SIO    | 7 0.98706  | 0.99519 | 0.99689 | 0.03077(NS) | 0.01475(NS)  | 0.68082 | 0           |         |             |             |             |              |              |             |              |         |
| LJP    | 8 0.97746  | 0.97883 | 0.9806  | 0.74436     | 0.70249      | 0.58722 | 0.76525     | 0       |             |             |             |              |              |             |              |         |
| LJP2   | 9 0.97818  | 0.98051 | 0.98293 | 0.72049     | 0.65922      | 0.47991 | 0.75284     | 0.53345 | 0           |             |             |              |              |             |              |         |
| LJP3   | 10 0.98689 | 0.99699 | 0.99903 | -0.0063(NS) | -0.02161(NS) | 0.66299 | 0.02005(NS) | 0.75538 | 0.74396     | 0           |             |              |              |             |              |         |
| RP1    | 11 0.98842 | 0.98929 | 0.99084 | 0.9916      | 0.99003      | 0.98378 | 0.99301     | 0.98646 | 0.98626     | 0.99269     | 0           |              |              |             |              |         |
| RP2    | 12 0.98859 | 0.98962 | 0.99115 | 0.99179     | 0.99024      | 0.98394 | 0.99321     | 0.98659 | 0.98645     | 0.99294     | 0.08497(NS) | 0            |              |             |              |         |
| IP     | 13 0.99096 | 0.99389 | 0.99517 | 0.99453     | 0.99311      | 0.9867  | 0.99596     | 0.98879 | 0.98939     | 0.9963      | 0.72104     | 0.73923      | 0            |             |              |         |
| AB3    | 14 0.98911 | 0.99055 | 0.99204 | 0.99241     | 0.99089      | 0.98458 | 0.99383     | 0.9871  | 0.98712     | 0.9937      | 0.70451     | 0.71878      | 0.50463      | 0           |              |         |
| AB2    | 15 0.98882 | 0.98992 | 0.99134 | 0.99193     | 0.99046      | 0.98446 | 0.99328     | 0.98691 | 0.98686     | 0.99304     | 0.69994     | 0.716        | 0.50636      | 0.00561(NS) | 0            |         |
| AB     | 16 0.98871 | 0.98972 | 0.99116 | 0.9918      | 0.99033      | 0.98434 | 0.99315     | 0.98681 | 0.98672     | 0.99288     | 0.69899     | 0.71496      | 0.52457      | 0.05984(NS) | -0.03807(NS) |         |
| ABR    | 17 0.99339 | 0.99848 | 0.99951 | 0.99756     | 0.99629      | 0.98974 | 0.99899     | 0.99123 | 0.99264     | 1           | 0.83697     | 0.84885      | 0.79587      | 0.4         | 0.40435      |         |
| PVL    | 18 0.99207 | 0.99602 | 0.99719 | 0.99595     | 0.99459      | 0.9881  | 0.99737     | 0.98992 | 0.9909      | 0.99803     | 0.84318     | 0.85108      | 0.90728      | 0.87785     | 0.86855      |         |
| RsPt   | 19 0.98961 | 0.99156 | 0.99299 | 0.993       | 0.99149      | 0.98506 | 0.99444     | 0.98747 | 0.98768     | 0.99446     | 0.80731     | 0.81504      | 0.86557      | 0.8427      | 0.83629      |         |
| FR1    | 20 0.99191 | 0.99568 | 0.99687 | 0.99571     | 0.99434      | 0.98786 | 0.99714     | 0.98972 | 0.99064     | 0.99774     | 0.85305     | 0.86137      | 0.90765      | 0.87817     | 0.87088      |         |
| FR2    | 21 0.98371 | 0.98064 | 0.98268 | 0.98578     | 0.98392      | 0.97785 | 0.9872      | 0.98168 | 0.97996     | 0.98563     | 0.66376     | 0.6745       | 0.71096      | 0.70122     | 0.7008       |         |
| CCR1   | 22 0.99141 | 0.99443 | 0.99567 | 0.99451     | 0.99303      | 0.98635 | 0.99601     | 0.98865 | 0.98931     | 0.99644     | 0.98902     | 0.98931      | 0.99282      | 0.99009     | 0.98954      |         |
| CCR2   | 23 0.99096 | 0.99355 | 0.99483 | 0.99393     | 0.99244      | 0.98586 | 0.99542     | 0.98827 | 0.98875     | 0.99569     | 0.98838     | 0.98867      | 0.99215      | 0.98944     | 0.98894      |         |
| LH     | 24 0.99133 | 0.99426 | 0.99551 | 0.99448     | 0.99302      | 0.98647 | 0.99596     | 0.98875 | 0.98937     | 0.99635     | 0.98898     | 0.98926      | 0.99275      | 0.99004     | 0.9895       |         |
| NatBr1 | 25 0.99368 | 0.99854 | 0.99953 | 0.99749     | 0.99618      | 0.98952 | 0.99896     | 0.99116 | 0.99257     | 1           | 0.99259     | 0.99287      | 0.9963       | 0.99364     | 0.99292      |         |
| NatBr2 | 26 0.99292 | 0.99712 | 0.9982  | 0.9965      | 0.99515      | 0.98855 | 0.99797     | 0.9904  | 0.99153     | 0.99879     | 0.99141     | 0.99169      | 0.99513      | 0.99245     | 0.9918       |         |
| SC3    | 27 0.99073 | 0.99317 | 0.99448 | 0.99361     | 0.99209      | 0.98544 | 0.99512     | 0.98793 | 0.98835     | 0.99534     | 0.98798     | 0.98827      | 0.99179      | 0.98905     | 0.98856      |         |
| SC4    | 28 0.99202 | 0.99547 | 0.99665 | 0.99534     | 0.99393      | 0.98736 | 0.99681     | 0.98946 | 0.99029     | 0.99739     | 0.99004     | 0.99032      | 0.99377      | 0.99109     | 0.9905       |         |
| SC5    | 29 0.99224 | 0.99597 | 0.99712 | 0.99561     | 0.99418      | 0.98747 | 0.99711     | 0.98953 | 0.99048     | 0.99778     | 0.99041     | 0.9907       | 0.99416      | 0.99147     | 0.99086      |         |
| SCN    | 30 0.9908  | 0.99269 | 0.9937  | 0.99311     | 0.99186      | 0.98645 | 0.99434     | 0.98838 | 0.98883     | 0.99438     | 0.98867     | 0.98889      | 0.99167      | 0.98951     | 0.98909      |         |
| BH     | 31 0.99318 | 0.99763 | 0.99868 | 0.99685     | 0.99551      | 0.98888 | 0.99832     | 0.99066 | 0.99189     | 0.99923     | 0.99183     | 0.99211      | 0.99555      | 0.99288     | 0.9922       |         |
| SC2    | 32 0.99222 | 0.99779 | 0.99931 | 0.99668     | 0.99488      | 0.98617 | 0.99862     | 0.98902 | 0.99004     | 1           | 0.98963     | 0.99002      | 0.99482      | 0.99109     | 0.99029      |         |
|        | 16         | 17      | 18      | 19          | 20           | 21      | 22          | 23      | 24          | 25          | 26          | 27           | 28           | 29          | 30           | 31      |
|        | AB         | ABR     | PVL     | RsPt        | FR1          | FR2     | CCR1        | CCR2    | LH          | NatBr1      | NatBr2      | SC3          | SC4          | SC5         | SCN          | BH      |
| AB     | 16 0       |         |         |             |              |         |             |         |             |             |             |              |              |             |              |         |
| ABR    | 17 0.44511 | 0       |         |             |              |         |             |         |             |             |             |              |              |             |              |         |
| PVL    | 18 0.86841 | 0.97046 | 0       |             |              |         |             |         |             |             |             |              |              |             |              |         |
| RsPt   | 19 0.83666 | 0.92571 | 0.46465 | 0           |              |         |             |         |             |             |             |              |              |             |              |         |
| FR1    | 20 0.86932 | 0.96748 | 0.92537 | 0.8733      | 0            |         |             |         |             |             |             |              |              |             |              |         |
| FR2    | 21 0.70115 | 0.78882 | 0.60544 | 0.57581     | 0.34444      | 0       |             |         |             |             |             |              |              |             |              |         |
| CCR1   | 22 0.98939 | 0.99656 | 0.99449 | 0.99077     | 0.99416      | 0.98168 | 0           |         |             |             |             |              |              |             |              |         |
| CCR2   | 23 0.98879 | 0.99584 | 0.99379 | 0.99011     | 0.99345      | 0.98111 | 0.57469     | 0       |             |             |             |              |              |             |              |         |
| LH     | 24 0.98935 | 0.99645 | 0.9944  | 0.99072     | 0.99407      | 0.98171 | 0.6859      | 0.49691 | 0           |             |             |              |              |             |              |         |
| NatBr1 | 25 0.99277 | 1       | 0.998   | 0.99438     | 0.9977       | 0.9854  | 0.875       | 0.7963  | 0.44444(NS) | 0           |             |              |              |             |              |         |
| NatBr2 | 26 0.99165 | 0.99882 | 0.99681 | 0.99318     | 0.9965       | 0.9842  | 0.83914     | 0.75381 | 0.38272(NS) | 0.07407(NS) | 0           |              |              |             |              |         |
| SC3    | 27 0.98841 | 0.99551 | 0.99344 | 0.98972     | 0.9931       | 0.98064 | 0.00836(NS) | 0.48675 | 0.6457      | 0.84641     | 0.81377     | 0            |              |             |              |         |
| SC4    | 28 0.99036 | 0.99746 | 0.99543 | 0.99178     | 0.99511      | 0.98282 | 0.77707     | 0.66287 | 0.2037(NS)  | 0(NS)       | 0.02469(NS) | 0.74778      | 0            |             |              |         |
| SC5    | 29 0.99071 | 0.99787 | 0.99584 | 0.99217     | 0.99552      | 0.98316 | 0.72689     | 0.59402 | 0.71014     | 0.91803     | 0.87847     | 0.58483(NS)  | 0.80144      | 0           |              |         |
| SCN    | 30 0.98898 | 0.99457 | 0.99293 | 0.98999     | 0.99265      | 0.98288 | -0.0557(NS) | 0.53008 | 0.63184     | 0.80426     | 0.77911     | -0.00758(NS) | 0.72103      | 0.64419     | 0            |         |
| BH     | 31 0.99205 | 0.99925 | 0.99724 | 0.99361     | 0.99693      | 0.98462 | 0.8433      | 0.75096 | 0.32593(NS) | 0.11111(NS) | 0.08889(NS) | 0.81481      | -0.02339(NS) | 0.88512     | 0.77651      | 0       |
| SC2    | 32 0.99008 | 1       | 0.9972  | 0.99213     | 0.99678      | 0.97961 | 0.60742     | 0.69718 | 0.79866     | 1           | 0.94786     | 0.46224(NS)  | 0.88074      | 0.85692     | 0.51026      | 0.96406 |
