# Supplementary material for: Investigations of fine-scale phylogeography in Tigriopus californicus reveal historical patterns of population divergence
Source: BMC Evol Biol. 2009 Jun 23;9:139. doi: 10.1186/1471-2148-9-139 (PMC2708153; doi:10.1186/1471-2148-9-139)
Supplement: Additional file 7 — Table S5. Measures of the departures of the frequency spectra within regions and sites from neutral expectations. [file 1471-2148-9-139-S7.pdf]

| CYT B  |            | Tajima's D      |             | Tajima's D      |             | Fu&Li D  |             | Fu&Li D |             | Fu&Li F  |             | Fu&Li F |             | Fay/Wu |                            |
|--------|------------|-----------------|-------------|-----------------|-------------|----------|-------------|---------|-------------|----------|-------------|---------|-------------|--------|----------------------------|
| Region | Population | all sites       | p-value     | non-syn. sites  | p-value     | unrooted | p value     | rooted  | p value     | unrooted | p value     | rooted  | p value     | H      | p value (no recombination) |
| SCruz  | NB1        | no polymorphism |             | no polymorphism |             |          |             |         |             |          |             |         |             |        |                            |
|        | NB2        | -0.69           | n.s.        | -1.11           | n.s.        | -0.28    | n.s.        | -0.41   | n.s.        | -0.42    | n.s.        | -0.56   | n.s.        | 0.44   | n.s.                       |
|        | BH         | 0.01            | n.s.        | no polymorphism |             | 0.8      | n.s.        | 0.73    | n.s.        | 0.68     | n.s.        | 0.67    | n.s.        | -1.07  | n.s.                       |
|        | SCN        | -0.57           | n.s.        | -0.17           | n.s.        | 1.36     | p<0.05      | 1.47    | n.s.        | 0.96     | n.s.        | 1.06    | n.s.        | -1.41  | n.s.                       |
|        | SC2        | no polymorphism |             | no polymorphism |             |          |             |         |             |          |             |         |             |        |                            |
|        | SC3        | -0.06           | n.s.        | 0.01            | n.s.        | 0.77     | n.s.        | 0.76    | n.s.        | 0.64     | n.s.        | 0.65    | n.s.        | -0.71  | n.s.                       |
|        | SC4        | -1.79           | p<0.05      | -1.56           | 0.05<p<0.10 | -2.08    | p<0.05      | 0.08    | n.s.        | -2.26    | p<0.05      | -0.48   | n.s.        | -6.04  | p=0.004                    |
|        | SC5        | -1.74           | p<0.05      | no polymorphism |             | -2.01    | 0.05<p<0.10 | -0.18   | n.s.        | -2.18    | 0.05<p<0.10 | -0.68   | n.s.        | -4.44  | p=0.003                    |
|        | LH         | 2.06            | p<0.05      | -1.84           | 0.05<p<0.10 | 1.15     | n.s.        | 1.15    | n.s.        | 1.53     | n.s.        | 1.61    | n.s.        | 0      | n.s.                       |
|        | CCR1       | -1.88           | p<0.05      | -1.40           | n.s.        | -2.18    | p<0.05      | -1.73   | n.s.        | -2.36    | p<0.05      | -2.13   | 0.05<p<0.10 | -2.13  | n.s.                       |
|        | CCR2       | -1.68           | 0.05<p<0.10 | -1.56           | 0.05<p<0.10 | -1.81    | 0.05<p<0.10 | -1.91   | 0.05<p<0.10 | -2       | 0.05<p<0.10 | -2.22   | 0.05<p<0.10 | -1.42  | n.s.                       |
|        | total      | 1.17            | n.s.        | 0.71            | n.s.        | -0.07    | n.s.        | -0.08   | n.s.        | 0.46     | n.s.        | 0.46    | n.s.        | 1.11   | n.s.                       |
| PVerde | FR1        | -0.9            | n.s.        | -1.09           | n.s.        | -1.13    | n.s.        | 1.27    | n.s.        | -1.21    | n.s.        | 0.85    | n.s.        | -5.42  | p=0.003                    |
|        | FR2        | 1.3             | n.s.        | -0.82           | n.s.        | 1.26     | n.s.        | 1.34    | n.s.        | 1.43     | n.s.        | 1.57    | n.s.        | -1.07  | n.s.                       |
|        | RsPt       | 0.8             | n.s.        | no polymorphism |             | -1       | n.s.        | 0.76    | n.s.        | -1.06    | n.s.        | 0.6     | n.s.        | -4.89  | p=0.02                     |
|        | PVL        | -0.43           | n.s.        | 1.40            | n.s.        | -0.8     | n.s.        | 0.74    | n.s.        | -0.8     | n.s.        | 0.36    | n.s.        | -1.6   | n.s.                       |
|        | ABR        | no polymorphism |             | no polymorphism |             |          |             |         |             |          |             |         |             |        |                            |
|        | AB1        | 0.22            | n.s.        | -0.10           | n.s.        | 0.58     | n.s.        | 0.96    | n.s.        | 0.55     | n.s.        | 1.06    | n.s.        | 1.31   | n.s.                       |
|        | AB2        | -0.98           | n.s.        | -0.25           | n.s.        | -0.48    | n.s.        | -0.54   | n.s.        | -0.69    | n.s.        | -0.78   | n.s.        | -0.44  | n.s.                       |
|        | AB3        | -2              | p<0.01      | -1.56           | 0.05<p<0.10 | -2.35    | p<0.02      | -1.89   | p<0.05      | -2.55    | p<0.02      | -2.31   | p<0.05      | -3.2   | p=0.05                     |
|        | IP         | -1.64           | n.s.        | -1.11           | n.s.        | -1.73    | n.s.        | -0.31   | n.s.        | -1.92    | n.s.        | -0.77   | n.s.        | -4     | p=0.02                     |
|        | RP1        | -0.46           | n.s.        | 0.20            | n.s.        | 0.11     | n.s.        | 1       | n.s.        | -0.04    | n.s.        | 0.84    | n.s.        | -2.76  | p=0.07                     |
|        | RP2        | 0.02            | n.s.        | -1.51           | n.s.        | -0.33    | n.s.        | -1.02   | n.s.        | -0.28    | n.s.        | -1.2    | n.s.        | 0.71   | n.s.                       |
|        | total      | -1.08           | n.s.        | -1.77           | 0.05<p<0.10 | -2.26    | 0.05<p<0.10 | -0.11   | n.s.        | -2.11    | 0.05<p<0.10 | -0.57   | n.s.        | -40.3  | p<0.001                    |
| LJolla | SIO        | -0.96           | n.s.        | -0.19           | n.s.        | -0.45    | n.s.        | -0.54   | n.s.        | -0.66    | n.s.        | -0.75   | n.s.        | 0.35   | n.s.                       |
|        | LJP1       | -0.66           | n.s.        | -0.37           | n.s.        | -0.05    | n.s.        | 0.05    | n.s.        | -0.27    | n.s.        | -0.15   | n.s.        | -2.85  | p=0.08                     |
|        | LJP2       | -0.94           | n.s.        | -0.35           | n.s.        | -0.07    | n.s.        | 1.16    | n.s.        | -0.23    | n.s.        | 0.71    | n.s.        | -7.02  | p=0.01                     |
|        | LJP3       | no polymorphism |             | no polymorphism |             |          |             |         |             |          |             |         |             |        |                            |
|        | LJS        | -1.73           | n.s.        | -1.16           | n.s.        | -1.88    | n.s.        | -1.17   | n.s.        | -2.1     | 0.05<p<0.10 | -1.53   | n.s.        | -1.09  | n.s.                       |
|        | NAUT       | -2.09           | p<0.01      | no polymorphism |             | -2.66    | p<0.02      | -2.18   | 0.05<p<0.10 | -2.86    | p<0.02      | -2.57   | p<0.05      | -2.39  | p=0.05                     |
|        | BR         | 0.33            | n.s.        | -1.16           | n.s.        | 0.74     | n.s.        | 0.6     |             |          |             |         |             |        |                            |
