# Supplementary material for: Investigations of fine-scale phylogeography in Tigriopus californicus reveal historical patterns of population divergence
Source: BMC Evol Biol. 2009 Jun 23;9:139. doi: 10.1186/1471-2148-9-139 (PMC2708153; doi:10.1186/1471-2148-9-139)
Supplement: Additional file 9 — Table S7. RISP nucleotide and indel variation found in Santa Cruz region and PES for T. californicus. [file 1471-2148-9-139-S9.pdf]

**Supplemental Table S7.** *RISP* nucleotide and indel variation found in Santa Cruz region and PES for *T. californicus*. Site numbers correspond to supplemental align positions. Shaded changes indicate derived allele determined by sequences found in LJ and PV regions (some ambiguous sites are indicated by a ?). Positions with numbers indicate presence or absence of indel.

|       |       | 137 | 149 | 157 | 159 | 161 | 217 | 276 | 283 | 304 | 362 | 405 | 412 | 456 | 470 | 479 | 487 | 518 | 591 | 611 | 683 | 726 | 731 | 753 | 759 | 770 |
|-------|-------|-----|-----|-----|-----|-----|-----|-----|-----|-----|-----|-----|-----|-----|-----|-----|-----|-----|-----|-----|-----|-----|-----|-----|-----|-----|
| LH    | m1-A  | G   | C   | T   | A   | 1   | 1   | C   | T   | A   | C   | C   | 1   | C   | A   | G   | A   | A   | T   | 1   | C   | G   | 1   | T   | C   | T   |
|       | f6-A  | G   | C   | T   | A   | 1   | 1   | C   | T   | A   | C   | C   | 1   | C   | A   | G   | A   | A   | T   | 1   | C   | G   | 1   | T   | C   | T   |
|       | f8-A  | G   | C   | T   | A   | 1   | 1   | C   | T   | A   | C   | C   | 1   | C   | A   | G   | A   | A   | T   | 1   | C   | G   | 1   | T   | C   | T   |
|       | m1-B  | G   | C   | T   | A   | 1   | 1   | C   | T   | A   | C   | C   | 1   | C   | A   | G   | A   | A   | T   | 1   | C   | G   | 1   | T   | C   | T   |
|       | f6-B  | G   | C   | T   | A   | 1   | 1   | C   | T   | A   | C   | C   | 1   | C   | A   | G   | A   | A   | T   | 1   | C   | G   | 1   | T   | C   | T   |
|       | f8-B  | G   | C   | T   | A   | 1   | 1   | C   | T   | A   | C   | C   | 1   | C   | A   | G   | A   | A   | T   | 1   | C   | G   | 1   | T   | C   | T   |
| SCN   | h-1   | G   | C   | T   | A   | 1   | 1   | C   | T   | A   | C   | C   | 1   | C   | A   | G   | A   | A   | T   | 1   | C   | G   | 1   | T   | C   | T   |
|       | h-2   | G   | C   | T   | A   | 1   | 1   | C   | T   | A   | C   | C   | 1   | C   | A   | G   | A   | A   | T   | 1   | C   | G   | 1   | T   | C   | T   |
|       | m3-A  | G   | C   | T   | A   | 1   | 1   | C   | T   | A   | C   | C   | 1   | C   | A   | G   | A   | A   | T   | 1   | C   | G   | 1   | T   | C   | T   |
|       | m5-A  | G   | C   | T   | A   | 1   | 1   | C   | T   | A   | C   | C   | 1   | C   | A   | G   | A   | A   | T   | 1   | C   | G   | 1   | T   | C   | T   |
|       | m7-A  | G   | C   | T   | A   | 1   | 1   | C   | T   | A   | C   | C   | 1   | C   | A   | G   | A   | A   | T   | 1   | C   | G   | 1   | T   | C   | T   |
|       | m5-B  | G   | C   | T   | A   | 1   | 1   | C   | T   | A   | C   | C   | 1   | C   | A   | G   | A   | A   | T   | 1   | C   | G   | 1   | T   | C   | T   |
|       | m7-B  | G   | C   | T   | A   | 1   | 1   | C   | T   | A   | C   | C   | 1   | C   | A   | G   | A   | A   | T   | 1   | C   | G   | 1   | T   | C   | T   |
|       | m3-B  | G   | C   | T   | A   | 1   | 1   | C   | T   | A   | C   | C   | 1   | C   | A   | G   | A   | A   | T   | 1   | C   | G   | 1   | T   | C   | T   |
| PES   | m9-A  | T   | G   | G   | T   | 2   | 2   | T   | G   | G   | A   | G   | 2   | G   | T   | T   | T   | G   | C   | 2   | G   | C   | 2   | G   | T   | G   |
|       | m9-B  | G   | C   | T   | A   | 1   | 1   | C   | T   | A   | A   | G   | 2   | C   | A   | G   | A   | A   | T   | 1   | C   | G   | 1   | T   | C   | T   |
|       | m10-A | T   | G   | G   | T   | 2   | 2   | T   | G   | G   | A   | G   | 2   | G   | T   | T   | T   | G   | C   | 2   | G   | C   | 2   | G   | T   | G   |
|       | m10-B | T   | G   | G   | T   | 2   | 2   | T   | G   | G   | A   | G   | 2   | G   | T   | T   | T   | G   | C   | 2   | G   | C   | 2   | G   | T   | G   |
| PV/LJ |       | T   | C   | T   | A   | 1   | 2   | C   | G   | G   | C   | C   | 1   | C   | ?   | ?   | ?   | G   | ?   | ?   | C   | C   | 1   | T   | T   | T   |

  

|       |       | 811 | 814 | 853 | 911 | 919 | 946 | 952 | 984 | 986 | 1031 | 1044 | 1087 | 1099 | 1129 | 1159 | 1162 | 1248 | 1574 | 1590 | 1593 | 1597 | 1620 | 1795 | 1843 | hap# |
|-------|-------|-----|-----|-----|-----|-----|-----|-----|-----|-----|------|------|------|------|------|------|------|------|------|------|------|------|------|------|------|------|
| LH    | m1-A  | G   | C   | G   | 1   | A   | G   | T   | C   | G   | G    | C    | T    | C    | C    | A    | T    | G    | T    | T    | 1    | T    | C    | G    | A    | 1    |
|       | f6-A  | G   | C   | G   | 2   | A   | G   | T   | C   | G   | G    | C    | T    | C    | C    | A    | T    | G    | T    | T    | 1    | T    | C    | G    | A    | 2    |
|       | f8-A  | G   | C   | G   | 1   | A   | G   | T   | C   | G   | G    | C    | T    | C    | C    | A    | T    | G    | T    | T    | 1    | T    | C    | G    | A    | 1    |
|       | m1-B  | G   | C   | G   | 1   | A   | G   | T   | C   | G   | G    | C    | T    | C    | C    | A    | T    | G    | T    | T    | 1    | T    | C    | G    | A    | 1    |
|       | f6-B  | G   | C   | G   | 1   | A   | G   | T   | C   | G   | G    | C    | T    | C    | C    | A    | T    | G    | T    | T    | 1    | T    | C    | G    | A    | 1    |
|       | f8-B  | G   | C   | G   | 1   | A   | G   | T   | C   | G   | G    | C    | T    | C    | C    | A    | T    | G    | T    | T    | 1    | T    | C    | G    | A    | 1    |
| SCN   | h-1   | G   | C   | G   | 1   | A   | G   | T   | C   | G   | G    | C    | T    | C    | C    | A    | T    | G    | T    | T    | 1    | T    | C    | G    | A    | 1    |
|       | h-2   | G   | C   | G   | 1   | A   | G   | T   | G   | G   | G    | C    | T    | C    | C    | A    | T    | G    | T    | C    | 2    | G    | C    | G    | G    | 3    |
|       | m3-A  | G   | C   | G   | 1   | A   | G   | T   | C   | G   | G    | C    | T    | C    | C    | A    | T    | G    | T    | T    | 1    | T    | C    | G    | A    | 1    |
|       | m5-A  | G   | C   | G   | 1   | A   | G   | T   | C   | G   | G    | C    | T    | C    | C    | A    | T    | G    | T    | T    | 1    | T    | C    | G    | A    | 1    |
|       | m7-A  | G   | C   | G   | 1   | A   | G   | T   | C   | G   | G    | C    | T    | C    | C    | A    | T    | G    | T    | T    | 1    | T    | C    | G    | A    | 1    |
|       | m5-B  | G   | C   | G   | 1   | A   | G   | T   | C   | G   | G    | C    | T    | C    | C    | A    | T    | G    | T    | T    | 1    | T    | C    | G    | A    | 1    |
|       | m7-B  | G   | C   | G   | 1   | A   | G   | T   | C   | G   | G    | C    | T    | C    | C    | A    | T    | G    | T    | T    | 1    | T    | C    | T    | A    | 4    |
|       | m3-B  | G   | C   | G   | 1   | A   | G   | T   | C   | G   | G    | C    | T    | C    | C    | A    | T    | G    | T    | T    | 1    | T    | C    | G    | A    | 1    |
| PES   | m9-A  | T   | A   | C   | 1   | G   | A   | C   | C   | T   | A    | C    | A    | G    | A    | G    | C    | A    | G    | T    | 1    | T    | T    | G    | G    | 5    |
|       | m9-B  | G   | C   | G   | 1   | G   | G   | T   | C   | G   | A    | C    | A    | G    | A    | G    | C    | A    | G    | T    | 1    | T    | T    | G    | G    | 6    |
|       | m10-A | T   | A   | C   | 1   | G   | A   | C   | C   | T   | A    | A    | A    | G    | A    | G    | C    | A    | G    | T    | 1    | T    | T    | G    | G    | 7    |
|       | m10-B | T   | A   | C   | 1   | G   | A   | C   | C   | T   | A    | C    | G    | G    | A    | G    | C    | A    | G    | T    | 1    | T    | T    | G    | G    | 8    |
| PV/LJ |       | T   | A   | G   | 1   | G   | G   | T   | C   | T   | G    | A    | ?    | ?    | A    | A    | C    | G    | G    | T    | 1    | T    | C    | G    | G    |      |
