# Supplementary material for: Investigations of fine-scale phylogeography in Tigriopus californicus reveal historical patterns of population divergence
Source: BMC Evol Biol. 2009 Jun 23;9:139. doi: 10.1186/1471-2148-9-139 (PMC2708153; doi:10.1186/1471-2148-9-139)
Supplement: Additional file 10 — Table S8. RISP nucleotide and indel variation found in La Jolla region for T. californicus. [file 1471-2148-9-139-S10.pdf]

**Supplemental Table S8** *RISP* nucleotide and indel variation found in La Jolla region for *T. californicus*. Site numbers correspond to supplemental align positions. Shaded changes are derived changes as indicated by *RISP* sequence at that position found in SD (consensus sequence from SD *RISP* listed on last line). Numbers indicate presence or absence of an insertion or deletion.

|      |       | 95 | 119 | 193 | 265 | 293 | 400 | 401 | 418 | 426 | 445 | 464 | 489 | 496 | 525 | 537 | 538 | 574 | 681 | 699  | 736 | 748 | 754 | 762 | 781 | 803 | 804 | 813 | 814 | 823 | 884 | 920 | 936 | 1087 | 1112 | 1184 | 1504 | 1554 | 1555 | 1571 | 1575 | 1828 | Hap. # |
|------|-------|----|-----|-----|-----|-----|-----|-----|-----|-----|-----|-----|-----|-----|-----|-----|-----|-----|-----|------|-----|-----|-----|-----|-----|-----|-----|-----|-----|-----|-----|-----|-----|------|------|------|------|------|------|------|------|------|--------|
| LJP  | m1-A  | A  | G   | C   | T   | A   | A   | A   | T   | A   | G   | C   | 1   | 1   | 1   | A   | A   | G   | 1   | T    | C   | A   | C   | C   | 1   | T   | A   | C   | A   | 1   | A   | T   | T   | A    | G    | 1    | G    | G    | G    | G    | C    | 1    |        |
|      | m7-A  | A  | G   | C   | T   | A   | A   | A   | T   | A   | G   | C   | 1   | 1   | 1   | A   | A   | G   | 1   | T    | T   | A   | C   | C   | 1   | T   | A   | C   | A   | 1   | A   | T   | T   | T    | G    | 2    | G    | G    | G    | G    | C    | 2    |        |
|      | m2-A  | A  | G   | C   | G   | A   | A   | A   | T   | A   | G   | C   | 1   | 1   | 1   | A   | A   | G   | 1   | T    | T   | A   | C   | T   | 1   | T   | A   | C   | A   | 1   | A   | G   | T   | T    | G    | 2    | G    | G    | G    | G    | C    | 3    |        |
|      | m6-B  | A  | G   | C   | T   | A   | A   | C   | T   | A   | G   | C   | 2   | 2   | 2   | A   | A   | G   | 1   | T    | T   | A   | A   | C   | 1   | T   | A   | C   | A   | 1   | A   | T   | T   | A    | G    | 2    | G    | G    | G    | G    | C    | 4    |        |
|      | m7-B  | A  | G   | T   | G   | A   | A   | A   | T   | A   | G   | C   | 1   | 1   | 1   | A   | T   | G   | 1   | T    | T   | A   | C   | C   | 1   | T   | A   | C   | A   | 1   | A   | G   | T   | T    | G    | 2    | G    | G    | G    | G    | C    | 5    |        |
|      | m2-B  | A  | G   | C   | G   | A   | A   | A   | G   | A   | C   | 2   | 2   | 2   | 1   | A   | A   | G   | 1   | T    | T   | A   | C   | C   | 1   | T   | A   | C   | G   | 2   | A   | G   | T   | T    | G    | 2    | G    | G    | G    | G    | C    | 6    |        |
|      | m1-B  | A  | G   | C   | T   | A   | A   | A   | T   | A   | G   | C   | 1   | 1   | 1   | A   | A   | G   | 1   | T    | C   | A   | C   | C   | 1   | T   | A   | C   | A   | 1   | G   | T   | T   | A    | G    | 1    | G    | G    | G    | G    | C    | 7    |        |
|      | m6-A  | G  | A   | C   | T   | A   | A   | A   | T   | A   | G   | C   | 1   | 1   | 1   | A   | A   | G   | 1   | T    | C   | A   | C   | C   | 1   | T   | A   | C   | A   | 1   | A   | G   | T   | T    | A    | 1    | A    | G    | G    | G    | C    | 8    |        |
| LJS  | m1-B  | A  | G   | C   | T   | A   | C   | C   | G   | A   | G   | C   | 1   | 1   | 1   | T   | A   | G   | 1   | T    | C   | A   | C   | C   | 1   | A   | T   | C   | G   | 2   | A   | G   | T   | A    | G    | 1    | G    | T    | T    | G    | C    | 9    |        |
|      | m1-A  | A  | G   | C   | T   | A   | A   | C   | T   | A   | G   | C   | 1   | 1   | 1   | A   | A   | G   | 1   | T    | C   | A   | C   | C   | 1   | T   | T   | C   | G   | 2   | A   | G   | T   | T    | G    | 1    | G    | G    | T    | G    | C    | 10   |        |
|      | m2-A  | A  | G   | C   | G   | A   | A   | A   | G   | A   | G   | C   | 1   | 1   | 1   | A   | A   | G   | 1   | T    | T   | A   | C   | C   | 1   | T   | T   | C   | G   | 2   | A   | T   | T   | T    | G    | 2    | G    | G    | G    | G    | C    | 11   |        |
|      | m2-B  | G  | G   | C   | T   | A   | A   | A   | T   | A   | G   | C   | 1   | 1   | 1   | A   | A   | G   | 1   | A    | C   | A   | C   | C   | 1   | T   | A   | C   | A   | 1   | A   | T   | T   | T    | G    | 2    | G    | G    | A    | G    | C    | 12   |        |
|      | f9-B  | A  | G   | C   | T   | A   | A   | A   | T   | A   | G   | C   | 1   | 1   | 1   | A   | A   | G   | 2   | ---- | A   | C   | A   | C   | C   | 1   | T   | A   | C   | G   | 2   | A   | G   | T    | A    | G    | 1    | G    | G    | A    | G    | C    | 13     |
|      | f9-A  | A  | G   | C   | T   | A   | A   | A   | T   | A   | G   | C   | 1   | 1   | 1   | A   | T   | C   | 1   | T    | C   | A   | C   | C   | 1   | T   | T   | C   | G   | 2   | A   | G   | T   | A    | G    | 2    | G    | G    | A    | G    | C    | 14   |        |
|      | f10-B | A  | G   | C   | T   | A   | A   | A   | T   | A   | G   | C   | 1   | 1   | 1   | A   | T   | C   | 1   | T    | C   | A   | C   | C   | 1   | T   | A   | C   | A   | 1   | A   | T   | T   | T    | G    | 1    | G    | G    | T    | G    | T    | 15   |        |
|      | f10-A | A  | G   | C   | T   | A   | A   | A   | T   | A   | G   | C   | 1   | 1   | 1   | A   | T   | G   | 1   | T    | T   | C   | A   | C   | 2   | T   | A   | C   | A   | 1   | A   | G   | T   | T    | G    | 2    | G    | G    | A    | G    | C    | 16   |        |
| BR   | f13-B | A  | G   | C   | T   | A   | C   | G   | G   | A   | A   | 2   | 2   | 1   | A   | T   | G   | 1   | T   | T    | A   | C   | C   | 1   | T   | T   | C   | G   | 2   | A   | G   | T   | A   | G    | 1    | G    | G    | G    | A    | C    | 17   |      |        |
|      | m5-A  | A  | G   | C   | G   | T   | A   | A   | T   | A   | G   | C   | 1   | 1   | 1   | A   | A   | G   | 1   | T    | T   | A   | C   | C   | 1   | T   | A   | T   | A   | 1   | A   | T   | A   | T    | G    | 2    | G    | G    | G    | A    | C    | 18   |        |
|      | m5-B  | A  | G   | C   | G   | A   | A   | A   | T   | G   | A   | C   | 2   | 2   | 1   | A   | A   | G   | 1   | T    | C   | A   | C   | C   | 1   | T   | T   | C   | G   | 2   | A   | G   | T   | A    | G    | 1    | G    | G    | G    | A    | C    | 19   |        |
|      | m8-B  | A  | G   | C   | G   | A   | A   | C   | G   | A   | G   | C   | 1   | 1   | 1   | A   | T   | G   | 1   | A    | C   | A   | C   | C   | 1   | T   | T   | C   | G   | 2   | A   | G   | T   | A    | G    | 2    | G    | G    | G    | G    | C    | 20   |        |
|      | f13-A | A  | G   | C   | G   | A   | A   | C   | T   | A   | G   | C   | 1   | 1   | 1   | A   | T   | G   | 1   | A    | C   | A   | C   | C   | 1   | T   | T   | C   | G   | 2   | A   | G   | T   | A    | G    | 2    | G    | G    | G    | G    | C    | 21   |        |
|      | m6-B  | A  | G   | C   | G   | A   | A   | C   | T   | A   | G   | C   | 1   | 1   | 1   | A   | T   | G   | 1   | A    | C   | A   | C   | C   | 1   | T   | T   | C   | G   | 2   | A   | G   | T   | A    | G    | 2    | G    | G    | G    | G    | C    | 21   |        |
|      | m7-A  | A  | G   | C   | G   | A   | A   | C   | T   | A   | G   | C   | 1   | 1   | 1   | A   | T   | G   | 1   | A    | C   | A   | C   | C   | 1   | T   | T   | C   | G   | 2   | A   | G   | T   | A    | G    | 2    | G    | G    | G    | G    | C    | 21   |        |
|      | m7-B  | A  | G   | C   | G   | A   | A   | C   | T   | A   | G   | C   | 1   | 1   | 1   | A   | T   | G   | 1   | A    | C   | A   | C   | C   | 1   | T   | T   | C   | G   | 2   | A   | G   | T   | A    | G    | 2    | G    | G    | G    | G    | C    | 21   |        |
| m6-A | A     | G  | C   | G   | A   | A   | C   | G   | A   | G   | C   | 1   | 1   | 1   | A   | T   | G   | 1   | A   | C    | A   | C   | C   | 1   | T   | T   | C   | G   | 2   | A   | G   | T   | T   | G    | 2    | G    | G    | G    | G    | C    | 22   |      |        |
|      | m8-A  | A  | G   | C   | G   | A   | A   | C   | G   | A   | G   | C   | 1   | 1   | 1   | A   | T   | G   | 1   | A    | C   | A   | C   | C   | 1   | T   | T   | C   | G   | 2   | A   | G   | T   | T    | G    | 2    | G    | G    | G    | G    | C    | 22   |        |
| SD   | cons. | A  | A   | C   | T   | C   | A   | C   | G   | A   | A   | C   | 1   | 1   | 1   | A   | T   | G   | 1   | T    | T   | A   | C   | C   | 2   | T   | A   | C   | A   | 2   | A   | G   | T   | T    | G    | 1    | G    | G    | G    | G    | C    |      |        |
