# Supplementary material for: Investigations of fine-scale phylogeography in Tigriopus californicus reveal historical patterns of population divergence
Source: BMC Evol Biol. 2009 Jun 23;9:139. doi: 10.1186/1471-2148-9-139 (PMC2708153; doi:10.1186/1471-2148-9-139)
Supplement: Additional file 11 — Table S9. RISP nucleotide and indel variation found in Palos Verdes region for T. californicus. [file 1471-2148-9-139-S11.pdf]

**Supplemental Table S9.** *RISP* nucleotide and indel variation found in Palos Verdes region for *T. californicus*. Site numbers correspond to supplemental align positions. Shaded changes are derived changes as indicated by *RISP* sequence at that position found in SD/SCN (listed on last line). Numbers indicate presence or absence of deletion.

|        |       | 53 | 54 | 70 | 72 | 95 | 163 | 166 | 168 | 254 | 265 | 293 | 305 | 329 | 351 | 424 | 425 | 426 | 427 | 430 | 829 | 852 | 954 | 1246 | 1525 | 1540 | 1628 | 1711 | 1819 | Hap. # |
|--------|-------|----|----|----|----|----|-----|-----|-----|-----|-----|-----|-----|-----|-----|-----|-----|-----|-----|-----|-----|-----|-----|------|------|------|------|------|------|--------|
| RP1    | m8-B  | C  | C  | C  | G  | A  | T   | 1   | A   | T   | T   | C   | 1   | 1   | C   | C   | T   | G   | T   | G   | 1   | G   | A   | G    | G    | C    | T    | C    | C    | 1      |
|        | m7-A  | C  | C  | C  | G  | A  | T   | 1   | A   | T   | T   | C   | 1   | 1   | C   | C   | T   | G   | T   | G   | 1   | G   | A   | G    | G    | C    | T    | C    | C    | 1      |
|        | m1-A  | C  | C  | C  | G  | A  | T   | 1   | A   | T   | T   | C   | 1   | 1   | C   | C   | T   | G   | T   | G   | 1   | G   | A   | G    | G    | C    | T    | C    | C    | 1      |
|        | m5-A  | C  | C  | C  | G  | A  | T   | 1   | A   | T   | T   | C   | 1   | 1   | C   | C   | T   | G   | T   | G   | 1   | G   | A   | G    | G    | C    | T    | C    | C    | 1      |
|        | m1-B  | C  | C  | C  | C  | A  | T   | 1   | A   | T   | T   | C   | 1   | 1   | C   | C   | T   | G   | T   | G   | 1   | G   | A   | G    | G    | C    | T    | C    | C    | 2      |
|        | m5-B  | C  | C  | G  | G  | A  | T   | 1   | A   | T   | T   | C   | 1   | 1   | C   | C   | T   | G   | T   | G   | 1   | G   | A   | G    | G    | C    | T    | C    | C    | 3      |
|        | m8-A  | C  | C  | C  | G  | A  | T   | 1   | A   | T   | T   | C   | 1   | 1   | C   | C   | T   | G   | T   | G   | 1   | G   | A   | G    | G    | C    | T    | C    | T    | 4      |
|        | m7-B  | C  | C  | C  | G  | A  | T   | 2   | T   | T   | T   | C   | 1   | 1   | C   | C   | T   | G   | T   | G   | 1   | G   | A   | G    | G    | C    | T    | C    | T    | 5      |
| IP     | m7-B  | C  | C  | C  | G  | A  | T   | 1   | A   | T   | T   | C   | 1   | 1   | C   | C   | T   | G   | T   | G   | 1   | G   | A   | G    | G    | C    | T    | C    | T    | 4      |
|        | f23-A | C  | C  | C  | G  | A  | T   | 1   | A   | T   | T   | C   | 1   | 2   | C   | C   | T   | G   | T   | G   | 1   | G   | A   | G    | G    | C    | T    | C    | T    | 6      |
|        | m7-A  | C  | C  | C  | G  | A  | T   | 1   | A   | T   | T   | C   | 1   | 2   | C   | C   | T   | G   | T   | G   | 1   | G   | A   | G    | G    | C    | T    | C    | T    | 6      |
|        | f3-B  | C  | C  | C  | G  | A  | T   | 1   | A   | T   | T   | C   | 1   | 2   | C   | C   | T   | G   | T   | G   | 1   | G   | A   | G    | G    | C    | T    | C    | T    | 6      |
|        | m8-B  | C  | C  | C  | G  | A  | T   | 1   | A   | T   | T   | C   | 1   | 2   | C   | C   | T   | G   | T   | G   | 1   | G   | A   | A    | G    | C    | T    | C    | T    | 7      |
|        | m8-A  | C  | C  | C  | G  | A  | G   | 1   | A   | T   | T   | C   | 1   | 2   | C   | C   | T   | G   | T   | G   | 1   | G   | A   | G    | G    | C    | T    | C    | T    | 8      |
|        | f3-A  | C  | T  | C  | G  | G  | T   | 1   | A   | T   | T   | C   | 2   | 1   | T   | C   | T   | G   | T   | G   | 1   | G   | A   | G    | G    | C    | T    | C    | T    | 9      |
|        | f23-B | C  | T  | C  | G  | G  | T   | 1   | A   | C   | G   | C   | 2   | 1   | T   | C   | T   | G   | T   | G   | 2   | G   | A   | G    | G    | C    | T    | G    | T    | 10     |
| AB     | g-1   | C  | T  | C  | G  | G  | T   | 1   | A   | C   | G   | C   | 2   | 1   | T   | C   | T   | G   | T   | G   | 1   | G   | A   | G    | G    | C    | C    | G    | T    | 11     |
|        | g-2   | C  | T  | C  | G  | G  | T   | 1   | A   | C   | G   | T   | 2   | 1   | T   | C   | T   | G   | T   | G   | 1   | G   | A   | G    | G    | C    | C    | G    | T    | 12     |
|        | h-1   | C  | T  | C  | G  | G  | T   | 1   | A   | C   | G   | T   | 2   | 1   | T   | C   | T   | G   | T   | G   | 1   | G   | A   | G    | G    | C    | C    | G    | T    | 12     |
|        | h-2   | C  | T  | C  | G  | G  | T   | 1   | A   | C   | G   | T   | 2   | 1   | T   | C   | T   | G   | T   | G   | 1   | G   | A   | G    | G    | C    | C    | G    | T    | 12     |
|        | m1-A  | T  | T  | C  | G  | G  | T   | 1   | A   | T   | T   | C   | 1   | 2   | C   | C   | T   | G   | T   | G   | 1   | G   | A   | G    | G    | C    | C    | G    | T    | 13     |
|        | m2-A  | C  | T  | C  | G  | G  | T   | 1   | A   | T   | T   | C   | 1   | 2   | C   | C   | T   | G   | T   | G   | 1   | G   | A   | G    | G    | C    | C    | G    | T    | 14     |
|        | m1-B  | C  | T  | C  | G  | G  | T   | 1   | A   | C   | G   | T   | 2   | 1   | T   | C   | T   | G   | T   | G   | 1   | G   | A   | G    | G    | C    | C    | G    | T    | 12     |
|        | m2-B  | C  | T  | C  | G  | G  | T   | 1   | A   | C   | G   | T   | 2   | 1   | T   | C   | T   | G   | T   | G   | 1   | G   | A   | G    | G    | C    | C    | G    | T    | 12     |
| PVL    | f12-A | C  | C  | C  | G  | A  | G   | 1   | A   | T   | T   | C   | 1   | 2   | C   | G   | T   | G   | T   | G   | 1   | G   | A   | G    | G    | C    | T    | C    | T    | 15     |
|        | f12-B | C  | C  | C  | G  | A  | G   | 1   | A   | T   | T   | C   | 1   | 2   | C   | G   | T   | G   | T   | G   | 1   | G   | A   | G    | G    | C    | T    | C    | T    | 15     |
|        | f14-B | C  | T  | C  | G  | G  | T   | 1   | A   | C   | G   | C   | 2   | 1   | T   | C   | T   | G   | T   | G   | 1   | A   | A   | G    | A    | T    | T    | C    | T    | 16     |
|        | f3-A  | C  | T  | C  | G  | G  | T   | 1   | A   | C   | G   | C   | 2   | 1   | T   | C   | T   | G   | T   | G   | 1   | A   | A   | G    | A    | T    | T    | C    | T    | 16     |
|        | f7-A  | C  | T  | C  | G  | G  | T   | 1   | A   | C   | G   | C   | 2   | 1   | T   | C   | C   | A   | A   | A   | 1   | A   | G   | G    | G    | C    | T    | C    | T    | 17     |
|        | f14-A | C  | T  | C  | G  | G  | T   | 1   | A   | C   | G   | C   | 2   | 1   | T   | C   | C   | A   | A   | A   | 1   | A   | G   | G    | G    | C    | T    | C    | T    | 17     |
|        | F3-B  | C  | T  | C  | G  | G  | T   | 1   | A   | C   | G   | C   | 2   | 1   | T   | C   | C   | A   | A   | A   | 1   | A   | G   | G    | G    | C    | T    | C    | T    | 17     |
|        | f7-B  | C  | T  | C  | G  | G  | T   | 1   | A   | C   | G   | C   | 2   | 1   | T   | C   | C   | A   | A   | A   | 1   | A   | G   | G    | G    | C    | T    | C    | T    | 17     |
| SD/SCN |       | C  | C  | C  | G  | A  | T/A | 1   | A   | -   | A/T | C   | 2   | 2   | C   | C   | T   | G/A | A   | G   | 1   | A   | A   | G    | A    | C    | C    | C    | T    |        |
